# Supplementary material for: Neurohormonal Activation After Atrial Fibrillation Initiation in Patients Eligible for Catheter Ablation: A Randomized Controlled Study
Source: PubMed Central journal article supplement — J Am Heart Assoc. 2016 Dec 12;5(12):e003957. doi: 10.1161/JAHA.116.003957 (PMC5210434; doi:10.1161/jaha.116.003957), 2016-12-12
Supplement: JAH3-5-e003957-s001.pdf [file JAH3-5-e003957-s001.pdf]

# Supplemental Material

**Table S1.** Baseline characteristics of patients included in the analyses of biomarkers in CS and those we were unable to catheterize CS

| Variables                                | Included in CS<br>analysis<br>(N=39) | Unable to catheterize CS<br>(N=6) | <i>P</i> value |
|------------------------------------------|--------------------------------------|-----------------------------------|----------------|
| Age                                      | 60 (IQR, 14)                         | 58 (IQR, 24)                      | 0.308          |
| Female Sex                               | 11 (28%)                             | 1 (17%)                           | 0.552          |
| BMI (kg/m <sup>2</sup> )                 | 26.2 (IQR, 5.5)                      | 31.5 (IQR, 10.8)                  | 0.133          |
| Paroxysmal AF                            | 20 (51%)                             | 1 (17%)                           | 0.114          |
| Heredity*                                | 16 (41%)                             | 3 (50%)                           | 0.291          |
| Hypertension                             | 16 (41%)                             | 2 (33%)                           | 0.72           |
| Heart failure †                          | 1 (3%)                               | 1 (17%)                           | 0.119          |
| IHD                                      | 3 (8%)                               | 0                                 | 0.482          |
| CKD (GFR<60 ml/min/1.73 m <sup>2</sup> ) | 7 (18%)                              | 0                                 | 0.259          |
| SVT                                      | 4 (10%)                              | 0                                 | 0.411          |
| TIA                                      | 3 (8%)                               | 0                                 | 0.482          |

|                                       |            |              |       |
|---------------------------------------|------------|--------------|-------|
| CHA <sub>2</sub> DS <sub>2</sub> VASc | 1 (IQR, 2) | 1 (IQR, 2.5) | 0.876 |
| Beta blocker                          | 15 (39%)   | 3 (50%)      | 0.591 |
| AAD                                   | 16 (41%)   | 2 (33%)      | 0.720 |
| ACEi or ARB                           | 12 (31%)   | 2 (33%)      | 0.899 |
| Statins                               | 11 (28%)   | 2 (33%)      | 0.796 |
| HR baseline (bpm)                     | 61±11      | 66±21        | 0.615 |
| Procedural time                       | 194±40     | 200±45       | 0.747 |
| EF (biplane)                          | 62±4       | 59±6         | 0.130 |

---

**Note 1:** Normally distributed variables are presented as mean values  $\pm$  SD, non-parametric variables are presented as median values with IQR, and categorical data are presented as counts and percentages

**Note 2:** Results from t-tests for normally distributed variables,  $\chi^2$  for categorical variables and Mann-Whitney U for non-parametric variables are presented and *P* values <0.05 are considered statistically significant

**Abbreviations:** AAD: anti-arrhythmic drugs; ACEi: angiotensin converting enzyme inhibitor; AF: atrial fibrillation; ARB: angiotensin-2 receptor blocker, BMI: body mass index; CHA<sub>2</sub>DS<sub>2</sub>VASc: congestive heart failure, hypertension, age>75 years, diabetes, stroke, vascular disease, female sex; CKD: chronic kidney disease; EF: ejection fraction; GFR: glomerular filtration rate; HR: heart rate; IQR: interquartile range; N: number of patients; SD: standard deviation; SVT: supraventricular tachycardia; TIA: transient ischemic attack.

\*First-degree relatives with AF

†EF<50%
